# Supplementary material
Source: ML conference proceedings conference paper supplement (https://openaccess.thecvf.com/content/CVPR2023/html/Tendulkar_FLEX_Full-Body_Grasping_CVPR_2023_paper.html)
Supplement: Supplementary file 1 [file Tendulkar_FLEX_Full-Body_Grasping_CVPR_2023_supplemental.zip]

Archive with 8 entries (8 files):
- evolution.mp4
- __MACOSX/._evolution.mp4
- index.html
- __MACOSX/._index.html
- Supp.pdf
- __MACOSX/._Supp.pdf
- teaser.mp4
- __MACOSX/._teaser.mp4
