# Supplementary material
Source: ML conference proceedings conference paper supplement (https://openaccess.thecvf.com/content/CVPR2023/html/Tendulkar_FLEX_Full-Body_Grasping_CVPR_2023_paper.html)
Supplement: Supplementary file 1 [file Tendulkar_FLEX_Full-Body_Grasping_CVPR_2023_supplemental.zip › index.html]

Full-Body Grasping Visualization


### Non Cherry Picked Results.

###### Each scene can be navigated by: 1. Clicking and dragging the mouse, to rotate the scene. 2. Zooming in and out with the scroll wheel. 3. Clicking at a point in the scene, to position that point in the center of the scene.

#### Select one or more model outputs to visualize.

FLEX (Ours)
SAGA
GOAL

| Receptacle Name | Example 1 | Example 2 | Example 3 |
| --- | --- | --- | --- |
| Chair |  |  |  |
| Sofa |  |  |  |
| Table 1 (top) |  |  |  |
| Table 2 (top) |  |  |  |
| Table 2 (middle) |  |  |  |
| Table 2 (bottom) |  |  |  |
| TV Stand (top) |  |  |  |
| TV Stand (middle) |  |  |  |
| TV Stand (bottom) |  |  |  |
| Wall Cabinet 1 (level 1) |  |  |  |
| Wall Cabinet 1 (level 2) |  |  |  |
| Wall Cabinet 1 (level 3) |  |  |  |
| Wall Cabinet 1 (level 4) |  |  |  |
| Wall Cabinet 1 (level 5) |  |  |  |
| Wall Cabinet 1 (level 6) |  |  |  |
| Wall Cabinet 2 (level 1) |  |  |  |
| Wall Cabinet 2 (level 2) |  |  |  |
| Wall Cabinet 2 (level 3) |  |  |  |
| Wall Cabinet 2 (level 4) |  |  |  |
| Wall Cabinet 2 (level 5) |  |  |  |
| Wall Cabinet 2 (level 6) |  |  |  |
| Refigerator Bottom |  |  |  |
| Refigerator Middle (bottom) |  |  |  |
| Refigerator Middle (top) |  |  |  |
| Refigerator Middle |  |  |  |
| Refigerator Top |  |  |  |
| Kitchen Cupboard Center (bottom-left) |  |  |  |
| Kitchen Cupboard Center (bottom-right) |  |  |  |
| Kitchen Cupboard Center (middle-left) |  |  |  |
| Kitchen Cupboard Center (middle-right) |  |  |  |
| Kitchen Cupboard Center (top-left) |  |  |  |
| Kitchen Cupboard Center (top-right) |  |  |  |
| Kitchen Cupboard Left (bottom) |  |  |  |
| Kitchen Cupboard Left (middle) |  |  |  |
| Kitchen Cupboard Left (top) |  |  |  |
| Kitchen Cupboard Right (bottom) |  |  |  |
| Kitchen Cupboard Right (middle) |  |  |  |
| Kitchen Cupboard Right (top) |  |  |  |
| Kitchen Counter (left) |  |  |  |
| Kitchen Counter (right) |  |  |  |
| Kitchen Drawer (left-bottom) |  |  |  |
| Kitchen Drawer (left-top) |  |  |  |
| Kitchen Drawer (middle-bottom) |  |  |  |
| Kitchen Drawer (middle-middle) |  |  |  |
| Kitchen Drawer (middle-top) |  |  |  |
| Kitchen Drawer (right-bottom) |  |  |  |
| Kitchen Drawer (right-top) |  |  |  |
| Kitchen Sink |  |  |  |
